# Supplementary material
Source: publisher figshare collection journal article supplement (https://wiley.figshare.com/articles/dataset/_/3550731)
Supplement: Supplementary file 1 [file 1 › appendix-A.htm]

Ecological Archives E092-038-A1


### *Ecological Archives* E092-038-A1

### **Ross Cressman and József Garay. 2011. The effects of opportunistic and intentional predators on the herding behavior of prey. *Ecology* 92:432–440.**

Appendix A. Existence and stability of equilibria.

> View / download PDF.

---


[Back to E092-038]
